# Supplementary material
Source: PubMed Central journal article supplement (PMC1298985)

## Supplementary information

S1. Enzymatic activities of superoxide dismutase, glutathione peroxidase and catalase in these cell lines that had been treated with hydrogen peroxide.

NIH3T3 cells harboring various mutants of DJ-1 were treated with various concentrations of hydrogen peroxide. Twelve hrs after treatment with hydrogen peroxide, catalase, glutathione peroxidase (cGPx) and superoxide dismutase (SOD) levels were measured by the procedures described by Kabuto *et al.* (2003), the reagent of Bioxytech GPx-340 (OXIS International Inc.) and SOD-assay kit-WST (Dojindo), respectively. Activities of these enzymes could not be measured in cells treated with hydrogen peroxide at concentrations of more than 100  $\mu$ M due to cell death.

Kabuto, H., Hasuike, S., Minagawa, N. & Shishibori, T. (2003) Effects of bisphenol A on the metabolisms of active oxygen species in mouse tissues. *Environ Res.* **93**, 31-35.

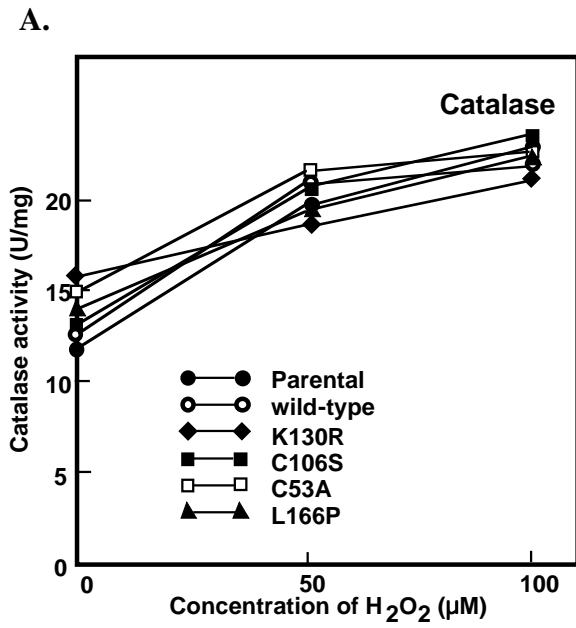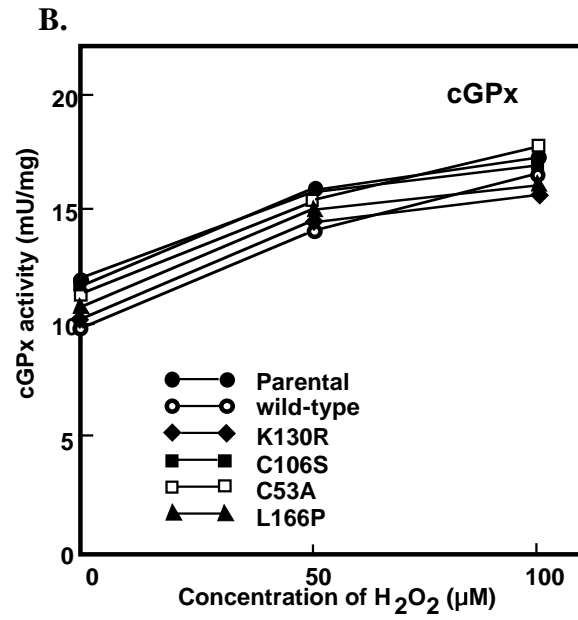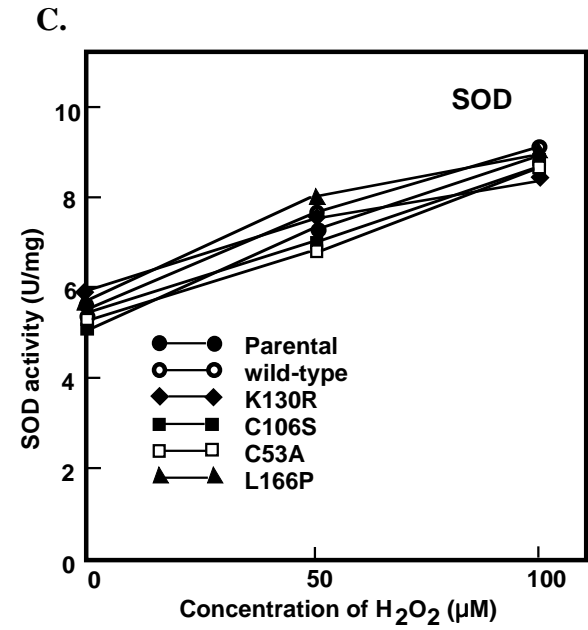

Supplement: 5-7400074s1.pdf [file 5-7400074s1.pdf]
